# Supplementary material for: Nitric oxide prevents Aft1 activation and metabolic remodeling in frataxin-deficient yeast
Source: PubMed Central journal article supplement — Redox Biol. 2017 Sep 6;14:131–41. doi: 10.1016/j.redox.2017.09.001 (PMC5602528; doi:10.1016/j.redox.2017.09.001), 2017-09-06
Supplement: mmc1.pdf [file mmc1.pdf]

**Supplemental Table 1: Transitions used for quantification of the indicated proteins**

| Protein Code (Swissprot) | Peptide Sequence | Light/Heavy | Precursor Mz | Precursor Charge | Product Mz  | Product Charge | Fragment Ion |
|--------------------------|------------------|-------------|--------------|------------------|-------------|----------------|--------------|
| sp P00331 ADH2_YEAST     | ANGTVVLVGLPAGAK  | L           | 683,906276   | 2                | 712,435201  | 1              | y8           |
| sp P00331 ADH2_YEAST     | ANGTVVLVGLPAGAK  | L           | 683,906276   | 2                | 613,366787  | 1              | y7           |
| sp P00331 ADH2_YEAST     | ANGTVVLVGLPAGAK  | L           | 683,906276   | 2                | 443,261259  | 1              | y5           |
| sp P00331 ADH2_YEAST     | ANGTVVLVGLPAGAK  | H           | 687,913376   | 2                | 720,4494    | 1              | y8           |
| sp P00331 ADH2_YEAST     | ANGTVVLVGLPAGAK  | H           | 687,913376   | 2                | 621,380986  | 1              | y7           |
| sp P00331 ADH2_YEAST     | ANGTVVLVGLPAGAK  | H           | 687,913376   | 2                | 451,275458  | 1              | y5           |
| sp P00331 ADH2_YEAST     | VVGLSSLPEIYEK    | L           | 717,39795    | 2                | 1065,546267 | 1              | y9           |
| sp P00331 ADH2_YEAST     | VVGLSSLPEIYEK    | L           | 717,39795    | 2                | 778,398146  | 1              | y6           |
| sp P00331 ADH2_YEAST     | VVGLSSLPEIYEK    | L           | 717,39795    | 2                | 439,218725  | 1              | y3           |
| sp P00331 ADH2_YEAST     | VVGLSSLPEIYEK    | H           | 721,405049   | 2                | 1073,560466 | 1              | y9           |
| sp P00331 ADH2_YEAST     | VVGLSSLPEIYEK    | H           | 721,405049   | 2                | 786,412345  | 1              | y6           |
| sp P00331 ADH2_YEAST     | VVGLSSLPEIYEK    | H           | 721,405049   | 2                | 447,232924  | 1              | y3           |
| sp P32191 GPDM_YEAST     | MSNYLVQNYGTR     | L           | 723,345725   | 2                | 950,505406  | 1              | y8           |
| sp P32191 GPDM_YEAST     | MSNYLVQNYGTR     | L           | 723,345725   | 2                | 837,421342  | 1              | y7           |
| sp P32191 GPDM_YEAST     | MSNYLVQNYGTR     | L           | 723,345725   | 2                | 738,352928  | 1              | y6           |
| sp P32191 GPDM_YEAST     | MSNYLVQNYGTR     | H           | 728,34986    | 2                | 960,513675  | 1              | y8           |
| sp P32191 GPDM_YEAST     | MSNYLVQNYGTR     | H           | 728,34986    | 2                | 847,429611  | 1              | y7           |
| sp P32191 GPDM_YEAST     | MSNYLVQNYGTR     | H           | 728,34986    | 2                | 748,361197  | 1              | y6           |
| sp P32191 GPDM_YEAST     | TPLDFLLR         | L           | 487,78711    | 2                | 776,466501  | 1              | y6           |
| sp P32191 GPDM_YEAST     | TPLDFLLR         | L           | 487,78711    | 2                | 663,382437  | 1              | y5           |
| sp P32191 GPDM_YEAST     | TPLDFLLR         | L           | 487,78711    | 2                | 437,26327   | 2              | y7           |
| sp P32191 GPDM_YEAST     | TPLDFLLR         | H           | 492,791244   | 2                | 786,47477   | 1              | y6           |
| sp P32191 GPDM_YEAST     | TPLDFLLR         | H           | 492,791244   | 2                | 673,390706  | 1              | y5           |
| sp P32191 GPDM_YEAST     | TPLDFLLR         | H           | 492,791244   | 2                | 442,267405  | 2              | y7           |
| sp Q07540 FRDA_YEAST     | LTDILTEEVEK      | L           | 645,345383   | 2                | 1075,551747 | 1              | y9           |
| sp Q07540 FRDA_YEAST     | LTDILTEEVEK      | L           | 645,345383   | 2                | 847,44074   | 1              | y7           |
| sp Q07540 FRDA_YEAST     | LTDILTEEVEK      | L           | 645,345383   | 2                | 734,356676  | 1              | y6           |
| sp Q07540 FRDA_YEAST     | LTDILTEEVEK      | H           | 649,352482   | 2                | 1083,565946 | 1              | y9           |
| sp Q07540 FRDA_YEAST     | LTDILTEEVEK      | H           | 649,352482   | 2                | 855,454939  | 1              | y7           |
| sp Q07540 FRDA_YEAST     | LTDILTEEVEK      | H           | 649,352482   | 2                | 742,370875  | 1              | y6           |

|                      |                   |   |            |   |             |   |     |
|----------------------|-------------------|---|------------|---|-------------|---|-----|
| sp Q07540 FRDA_YEAST | QIWLASPLSGP NR    | L | 719,8937   | 2 | 1197,637482 | 1 | y11 |
| sp Q07540 FRDA_YEAST | QIWLASPLSGP NR    | L | 719,8937   | 2 | 898,474105  | 1 | y9  |
| sp Q07540 FRDA_YEAST | QIWLASPLSGP NR    | L | 719,8937   | 2 | 827,436992  | 1 | y8  |
| sp Q07540 FRDA_YEAST | QIWLASPLSGP NR    | H | 724,897834 | 2 | 1207,645751 | 1 | y11 |
| sp Q07540 FRDA_YEAST | QIWLASPLSGP NR    | H | 724,897834 | 2 | 908,482374  | 1 | y9  |
| sp Q07540 FRDA_YEAST | QIWLASPLSGP NR    | H | 724,897834 | 2 | 837,445261  | 1 | y8  |
| sp P39676 FHP_YEAST  | VGAQPNALATTVLAAAK | L | 798,459404 | 2 | 1240,725963 | 1 | y13 |
| sp P39676 FHP_YEAST  | VGAQPNALATTVLAAAK | L | 798,459404 | 2 | 774,47198   | 1 | y8  |
| sp P39676 FHP_YEAST  | VGAQPNALATTVLAAAK | L | 798,459404 | 2 | 620,86662   | 2 | y13 |
| sp P39676 FHP_YEAST  | VGAQPNALATTVLAAAK | H | 802,466504 | 2 | 1248,740162 | 1 | y13 |
| sp P39676 FHP_YEAST  | VGAQPNALATTVLAAAK | H | 802,466504 | 2 | 782,486179  | 1 | y8  |
| sp P39676 FHP_YEAST  | VGAQPNALATTVLAAAK | H | 802,466504 | 2 | 624,873719  | 2 | y13 |
| sp P39676 FHP_YEAST  | ATVPVLEQQGTVITR   | L | 806,456861 | 2 | 1144,632063 | 1 | y10 |
| sp P39676 FHP_YEAST  | ATVPVLEQQGTVITR   | L | 806,456861 | 2 | 646,38825   | 1 | y6  |
| sp P39676 FHP_YEAST  | ATVPVLEQQGTVITR   | L | 806,456861 | 2 | 670,880258  | 2 | y12 |
| sp P39676 FHP_YEAST  | ATVPVLEQQGTVITR   | H | 811,460996 | 2 | 1154,640332 | 1 | y10 |
| sp P39676 FHP_YEAST  | ATVPVLEQQGTVITR   | H | 811,460996 | 2 | 656,396519  | 1 | y6  |
| sp P39676 FHP_YEAST  | ATVPVLEQQGTVITR   | H | 811,460996 | 2 | 675,884393  | 2 | y12 |
| sp P21801 DHSB_YEAST | DLVPDLTNFYQQYK    | L | 872,433052 | 2 | 1091,515636 | 1 | y8  |
| sp P21801 DHSB_YEAST | DLVPDLTNFYQQYK    | L | 872,433052 | 2 | 990,467957  | 1 | y7  |
| sp P21801 DHSB_YEAST | DLVPDLTNFYQQYK    | L | 872,433052 | 2 | 708,843341  | 2 | y11 |
| sp P21801 DHSB_YEAST | DLVPDLTNFYQQYK    | H | 876,440151 | 2 | 1099,529835 | 1 | y8  |
| sp P21801 DHSB_YEAST | DLVPDLTNFYQQYK    | H | 876,440151 | 2 | 998,482156  | 1 | y7  |
| sp P21801 DHSB_YEAST | DLVPDLTNFYQQYK    | H | 876,440151 | 2 | 712,850441  | 2 | y11 |
| sp P21801 DHSB_YEAST | DGTEVLQSIEDR      | L | 681,330795 | 2 | 959,515636  | 1 | y8  |
| sp P21801 DHSB_YEAST | DGTEVLQSIEDR      | L | 681,330795 | 2 | 419,188488  | 1 | y3  |
| sp P21801 DHSB_YEAST | DGTEVLQSIEDR      | L | 681,330795 | 2 | 502,214368  | 1 | b5  |
| sp P21801 DHSB_YEAST | DGTEVLQSIEDR      | H | 686,33493  | 2 | 969,523905  | 1 | y8  |
| sp P21801 DHSB_YEAST | DGTEVLQSIEDR      | H | 686,33493  | 2 | 429,196757  | 1 | y3  |
| sp P21801 DHSB_YEAST | DGTEVLQSIEDR      | H | 686,33493  | 2 | 502,214368  | 1 | b5  |
| sp Q00711 DHSA_YEAST | GEGGFLVNSEGER     | L | 675,817855 | 2 | 903,453036  | 1 | y8  |
| sp Q00711 DHSA_YEAST | GEGGFLVNSEGER     | L | 675,817855 | 2 | 790,368972  | 1 | y7  |
| sp Q00711 DHSA_YEAST | GEGGFLVNSEGER     | L | 675,817855 | 2 | 691,300558  | 1 | y6  |

|                      |                   |   |            |   |             |   |    |
|----------------------|-------------------|---|------------|---|-------------|---|----|
| sp Q00711 DHSA_YEAST | GEGGFLVNSEGER     | H | 680,821989 | 2 | 913,461305  | 1 | y8 |
| sp Q00711 DHSA_YEAST | GEGGFLVNSEGER     | H | 680,821989 | 2 | 800,377241  | 1 | y7 |
| sp Q00711 DHSA_YEAST | GEGGFLVNSEGER     | H | 680,821989 | 2 | 701,308827  | 1 | y6 |
| sp Q00711 DHSA_YEAST | DVAAPVTLK         | L | 457,271292 | 2 | 553,298038  | 1 | b6 |
| sp Q00711 DHSA_YEAST | DVAAPVTLK         | L | 457,271292 | 2 | 699,439952  | 1 | y7 |
| sp Q00711 DHSA_YEAST | DVAAPVTLK         | L | 457,271292 | 2 | 628,402838  | 1 | y6 |
| sp Q00711 DHSA_YEAST | DVAAPVTLK         | H | 461,278392 | 2 | 707,454151  | 1 | y7 |
| sp Q00711 DHSA_YEAST | DVAAPVTLK         | H | 461,278392 | 2 | 636,417037  | 1 | y6 |
| sp Q00711 DHSA_YEAST | DVAAPVTLK         | H | 461,278392 | 2 | 565,379923  | 1 | y5 |
| sp P11412 G6PD_YEAST | FGNQFLNASWNR      | L | 727,352199 | 2 | 1007,50574  | 1 | y8 |
| sp P11412 G6PD_YEAST | FGNQFLNASWNR      | L | 727,352199 | 2 | 860,437326  | 1 | y7 |
| sp P11412 G6PD_YEAST | FGNQFLNASWNR      | L | 727,352199 | 2 | 747,353262  | 1 | y6 |
| sp P11412 G6PD_YEAST | FGNQFLNASWNR      | H | 732,356334 | 2 | 1017,514009 | 1 | y8 |
| sp P11412 G6PD_YEAST | FGNQFLNASWNR      | H | 732,356334 | 2 | 870,445595  | 1 | y7 |
| sp P11412 G6PD_YEAST | FGNQFLNASWNR      | H | 732,356334 | 2 | 757,361531  | 1 | y6 |
| sp P11412 G6PD_YEAST | TFPALFGLFR        | L | 584,829309 | 2 | 920,535249  | 1 | y8 |
| sp P11412 G6PD_YEAST | TFPALFGLFR        | L | 584,829309 | 2 | 752,445371  | 1 | y6 |
| sp P11412 G6PD_YEAST | TFPALFGLFR        | L | 584,829309 | 2 | 639,361307  | 1 | y5 |
| sp P11412 G6PD_YEAST | TFPALFGLFR        | H | 589,833443 | 2 | 930,543518  | 1 | y8 |
| sp P11412 G6PD_YEAST | TFPALFGLFR        | H | 589,833443 | 2 | 762,45364   | 1 | y6 |
| sp P11412 G6PD_YEAST | TFPALFGLFR        | H | 589,833443 | 2 | 649,369576  | 1 | y5 |
| sp P00410 COX2_YEAST | LNQVSALIQR        | L | 571,338029 | 2 | 786,483214  | 1 | y7 |
| sp P00410 COX2_YEAST | LNQVSALIQR        | L | 571,338029 | 2 | 687,4148    | 1 | y6 |
| sp P00410 COX2_YEAST | LNQVSALIQR        | L | 571,338029 | 2 | 600,382771  | 1 | y5 |
| sp P00410 COX2_YEAST | LNQVSALIQR        | H | 576,342164 | 2 | 796,491483  | 1 | y7 |
| sp P00410 COX2_YEAST | LNQVSALIQR        | H | 576,342164 | 2 | 697,423069  | 1 | y6 |
| sp P00410 COX2_YEAST | LNQVSALIQR        | H | 576,342164 | 2 | 610,39104   | 1 | y5 |
| sp P00410 COX2_YEAST | LLDTDTSMVVPVDTHIR | L | 637,999664 | 3 | 936,526141  | 1 | y8 |
| sp P00410 COX2_YEAST | LLDTDTSMVVPVDTHIR | L | 637,999664 | 3 | 837,457727  | 1 | y7 |
| sp P00410 COX2_YEAST | LLDTDTSMVVPVDTHIR | L | 637,999664 | 3 | 419,232502  | 2 | y7 |
| sp P00410 COX2_YEAST | LLDTDTSMVVPVDTHIR | H | 641,335753 | 3 | 946,53441   | 1 | y8 |
| sp P00410 COX2_YEAST | LLDTDTSMVVPVDTHIR | H | 641,335753 | 3 | 847,465996  | 1 | y7 |
| sp P00410 COX2_YEAST | LLDTDTSMVVPVDTHIR | H | 641,335753 | 3 | 424,236636  | 2 | y7 |

|                       |                    |   |            |   |            |   |    |
|-----------------------|--------------------|---|------------|---|------------|---|----|
| sp P00401 COX1_YEAST  | APDFVESNTIFNLNTVK  | L | 636,994907 | 3 | 835,467229 | 1 | y7 |
| sp P00401 COX1_YEAST  | APDFVESNTIFNLNTVK  | L | 636,994907 | 3 | 688,398815 | 1 | y6 |
| sp P00401 COX1_YEAST  | APDFVESNTIFNLNTVK  | L | 636,994907 | 3 | 574,355888 | 1 | y5 |
| sp P00401 COX1_YEAST  | APDFVESNTIFNLNTVK  | L | 636,994907 | 3 | 461,271824 | 1 | y4 |
| sp P00401 COX1_YEAST  | APDFVESNTIFNLNTVK  | H | 639,666307 | 3 | 843,481428 | 1 | y7 |
| sp P00401 COX1_YEAST  | APDFVESNTIFNLNTVK  | H | 639,666307 | 3 | 696,413014 | 1 | y6 |
| sp P00401 COX1_YEAST  | APDFVESNTIFNLNTVK  | H | 639,666307 | 3 | 582,370087 | 1 | y5 |
| sp P00401 COX1_YEAST  | APDFVESNTIFNLNTVK  | H | 639,666307 | 3 | 469,286023 | 1 | y4 |
| sp P04840 VDAC1_YEAST | VSDSGIVTLAYK       | L | 626,84281  | 2 | 951,550959 | 1 | y9 |
| sp P04840 VDAC1_YEAST | VSDSGIVTLAYK       | L | 626,84281  | 2 | 864,51893  | 1 | y8 |
| sp P04840 VDAC1_YEAST | VSDSGIVTLAYK       | L | 626,84281  | 2 | 694,413403 | 1 | y6 |
| sp P04840 VDAC1_YEAST | VSDSGIVTLAYK       | H | 630,84991  | 2 | 959,565158 | 1 | y9 |
| sp P04840 VDAC1_YEAST | VSDSGIVTLAYK       | H | 630,84991  | 2 | 872,533129 | 1 | y8 |
| sp P04840 VDAC1_YEAST | VSDSGIVTLAYK       | H | 630,84991  | 2 | 702,427602 | 1 | y6 |
| sp P04840 VDAC1_YEAST | LEFANLTPGLK        | L | 601,842613 | 2 | 960,551293 | 1 | y9 |
| sp P04840 VDAC1_YEAST | LEFANLTPGLK        | L | 601,842613 | 2 | 742,445765 | 1 | y7 |
| sp P04840 VDAC1_YEAST | LEFANLTPGLK        | L | 601,842613 | 2 | 414,271095 | 1 | y4 |
| sp P04840 VDAC1_YEAST | LEFANLTPGLK        | H | 605,849713 | 2 | 968,565492 | 1 | y9 |
| sp P04840 VDAC1_YEAST | LEFANLTPGLK        | H | 605,849713 | 2 | 750,459964 | 1 | y7 |
| sp P04840 VDAC1_YEAST | LEFANLTPGLK        | H | 605,849713 | 2 | 422,285294 | 1 | y4 |
| sp P40215 NDH1_YEAST  | GALAYIGSDK         | L | 497,763831 | 2 | 753,377745 | 1 | y7 |
| sp P40215 NDH1_YEAST  | GALAYIGSDK         | L | 497,763831 | 2 | 682,340632 | 1 | y6 |
| sp P40215 NDH1_YEAST  | GALAYIGSDK         | L | 497,763831 | 2 | 433,734543 | 2 | y8 |
| sp P40215 NDH1_YEAST  | GALAYIGSDK         | H | 501,770931 | 2 | 761,391944 | 1 | y7 |
| sp P40215 NDH1_YEAST  | GALAYIGSDK         | H | 501,770931 | 2 | 690,354831 | 1 | y6 |
| sp P40215 NDH1_YEAST  | GALAYIGSDK         | H | 501,770931 | 2 | 437,741642 | 2 | y8 |
| sp P60010 ACT_YEAST   | VAPEEHPVLLTEAPMNPK | L | 658,011792 | 3 | 887,429129 | 1 | y8 |
| sp P60010 ACT_YEAST   | VAPEEHPVLLTEAPMNPK | L | 658,011792 | 3 | 786,381451 | 1 | y7 |
| sp P60010 ACT_YEAST   | VAPEEHPVLLTEAPMNPK | L | 658,011792 | 3 | 586,301744 | 1 | y5 |
| sp P60010 ACT_YEAST   | VAPEEHPVLLTEAPMNPK | H | 660,683192 | 3 | 895,443328 | 1 | y8 |
| sp P60010 ACT_YEAST   | VAPEEHPVLLTEAPMNPK | H | 660,683192 | 3 | 794,39565  | 1 | y7 |
| sp P60010 ACT_YEAST   | VAPEEHPVLLTEAPMNPK | H | 660,683192 | 3 | 594,315943 | 1 | y5 |
| sp P60010 ACT_YEAST   | SYELPDGQVITIGNER   | L | 597,63549  | 3 | 802,441743 | 1 | y7 |

|                      |                  |   |            |   |             |   |     |
|----------------------|------------------|---|------------|---|-------------|---|-----|
| sp P60010 ACT_YEAST  | SYELPDGQVITIGNER | L | 597,63549  | 3 | 689,357679  | 1 | y6  |
| sp P60010 ACT_YEAST  | SYELPDGQVITIGNER | L | 597,63549  | 3 | 475,225936  | 1 | y4  |
| sp P60010 ACT_YEAST  | SYELPDGQVITIGNER | H | 600,97158  | 3 | 812,450012  | 1 | y7  |
| sp P60010 ACT_YEAST  | SYELPDGQVITIGNER | H | 600,97158  | 3 | 699,365948  | 1 | y6  |
| sp P60010 ACT_YEAST  | SYELPDGQVITIGNER | H | 600,97158  | 3 | 485,234205  | 1 | y4  |
| sp P60010 ACT_YEAST  | HQGIMVGMGQK      | L | 395,867087 | 3 | 436,230293  | 1 | b4  |
| sp P60010 ACT_YEAST  | HQGIMVGMGQK      | L | 395,867087 | 3 | 567,270778  | 1 | b5  |
| sp P60010 ACT_YEAST  | HQGIMVGMGQK      | L | 395,867087 | 3 | 520,254793  | 1 | y5  |
| sp P60010 ACT_YEAST  | HQGIMVGMGQK      | H | 398,538487 | 3 | 436,230293  | 1 | b4  |
| sp P60010 ACT_YEAST  | HQGIMVGMGQK      | H | 398,538487 | 3 | 567,270778  | 1 | b5  |
| sp P60010 ACT_YEAST  | HQGIMVGMGQK      | H | 398,538487 | 3 | 528,268992  | 1 | y5  |
| sp P32340 NDI1_YEAST | YNDLGALAYLGSER   | L | 771,383362 | 2 | 1036,542185 | 1 | y10 |
| sp P32340 NDI1_YEAST | YNDLGALAYLGSER   | L | 771,383362 | 2 | 795,399543  | 1 | y7  |
| sp P32340 NDI1_YEAST | YNDLGALAYLGSER   | L | 771,383362 | 2 | 724,36243   | 1 | y6  |
| sp P32340 NDI1_YEAST | YNDLGALAYLGSER   | H | 776,387497 | 2 | 1046,550454 | 1 | y10 |
| sp P32340 NDI1_YEAST | YNDLGALAYLGSER   | H | 776,387497 | 2 | 805,407812  | 1 | y7  |
| sp P32340 NDI1_YEAST | YNDLGALAYLGSER   | H | 776,387497 | 2 | 734,370699  | 1 | y6  |
| sp P06169 PDC1_YEAST | TPANAAPVASTPLK   | L | 669,374809 | 2 | 883,524744  | 1 | y9  |
| sp P06169 PDC1_YEAST | TPANAAPVASTPLK   | L | 669,374809 | 2 | 812,48763   | 1 | y8  |
| sp P06169 PDC1_YEAST | TPANAAPVASTPLK   | L | 669,374809 | 2 | 713,419216  | 1 | y7  |
| sp P06169 PDC1_YEAST | TPANAAPVASTPLK   | H | 673,381908 | 2 | 891,538943  | 1 | y9  |
| sp P06169 PDC1_YEAST | TPANAAPVASTPLK   | H | 673,381908 | 2 | 820,501829  | 1 | y8  |
| sp P06169 PDC1_YEAST | TPANAAPVASTPLK   | H | 673,381908 | 2 | 721,433415  | 1 | y7  |
| sp P53312 SUCB_YEAST | DLSQEDPDEVK      | L | 637,790972 | 2 | 831,373054  | 1 | y7  |
| sp P53312 SUCB_YEAST | DLSQEDPDEVK      | L | 637,790972 | 2 | 587,303518  | 1 | y5  |
| sp P53312 SUCB_YEAST | DLSQEDPDEVK      | L | 637,790972 | 2 | 523,735468  | 2 | y9  |
| sp P53312 SUCB_YEAST | DLSQEDPDEVK      | H | 641,798071 | 2 | 839,387253  | 1 | y7  |
| sp P53312 SUCB_YEAST | DLSQEDPDEVK      | H | 641,798071 | 2 | 595,317717  | 1 | y5  |
| sp P53312 SUCB_YEAST | DLSQEDPDEVK      | H | 641,798071 | 2 | 527,742567  | 2 | y9  |
| sp P19414 ACON_YEAST | TIFTVTPGSEQIR    | L | 724,890823 | 2 | 562,323525  | 1 | b5  |
| sp P19414 ACON_YEAST | TIFTVTPGSEQIR    | L | 724,890823 | 2 | 887,458121  | 1 | y8  |
| sp P19414 ACON_YEAST | TIFTVTPGSEQIR    | L | 724,890823 | 2 | 786,410442  | 1 | y7  |
| sp P19414 ACON_YEAST | TIFTVTPGSEQIR    | H | 729,894957 | 2 | 562,323525  | 1 | b5  |

|                       |               |   |            |   |             |   |     |
|-----------------------|---------------|---|------------|---|-------------|---|-----|
| sp P19414 ACON_YEAST  | TIFTVTPGSEQIR | H | 729,894957 | 2 | 897,46639   | 1 | y8  |
| sp P19414 ACON_YEAST  | TIFTVTPGSEQIR | H | 729,894957 | 2 | 796,418711  | 1 | y7  |
| sp P19414 ACON_YEAST  | QNVETLDIVR    | L | 593,824952 | 2 | 944,541122  | 1 | y8  |
| sp P19414 ACON_YEAST  | QNVETLDIVR    | L | 593,824952 | 2 | 845,472708  | 1 | y7  |
| sp P19414 ACON_YEAST  | QNVETLDIVR    | L | 593,824952 | 2 | 716,430115  | 1 | y6  |
| sp P19414 ACON_YEAST  | QNVETLDIVR    | H | 598,829086 | 2 | 954,549391  | 1 | y8  |
| sp P19414 ACON_YEAST  | QNVETLDIVR    | H | 598,829086 | 2 | 855,480977  | 1 | y7  |
| sp P19414 ACON_YEAST  | QNVETLDIVR    | H | 598,829086 | 2 | 726,438384  | 1 | y6  |
| sp P00890 CISY1_YEAST | AIGVLPQLIIDR  | L | 654,405912 | 2 | 1123,68337  | 1 | y10 |
| sp P00890 CISY1_YEAST | AIGVLPQLIIDR  | L | 654,405912 | 2 | 967,593492  | 1 | y8  |
| sp P00890 CISY1_YEAST | AIGVLPQLIIDR  | L | 654,405912 | 2 | 854,509428  | 1 | y7  |
| sp P00890 CISY1_YEAST | AIGVLPQLIIDR  | H | 659,410046 | 2 | 1133,691639 | 1 | y10 |
| sp P00890 CISY1_YEAST | AIGVLPQLIIDR  | H | 659,410046 | 2 | 977,601761  | 1 | y8  |
| sp P00890 CISY1_YEAST | AIGVLPQLIIDR  | H | 659,410046 | 2 | 864,517697  | 1 | y7  |
| sp P00330 ADH1_YEAST  | ANELLINVK     | L | 507,303124 | 2 | 699,476337  | 1 | y6  |
| sp P00330 ADH1_YEAST  | ANELLINVK     | L | 507,303124 | 2 | 586,392273  | 1 | y5  |
| sp P00330 ADH1_YEAST  | ANELLINVK     | L | 507,303124 | 2 | 473,308209  | 1 | y4  |
| sp P00330 ADH1_YEAST  | ANELLINVK     | H | 511,310223 | 2 | 707,490536  | 1 | y6  |
| sp P00330 ADH1_YEAST  | ANELLINVK     | H | 511,310223 | 2 | 594,406472  | 1 | y5  |
| sp P00330 ADH1_YEAST  | ANELLINVK     | H | 511,310223 | 2 | 481,322408  | 1 | y4  |
| sp P00330 ADH1_YEAST  | VVGLSTLPEIYEK | L | 724,405775 | 2 | 1079,561917 | 1 | y9  |
| sp P00330 ADH1_YEAST  | VVGLSTLPEIYEK | L | 724,405775 | 2 | 891,48221   | 1 | y7  |
| sp P00330 ADH1_YEAST  | VVGLSTLPEIYEK | L | 724,405775 | 2 | 778,398146  | 1 | y6  |
| sp P00330 ADH1_YEAST  | VVGLSTLPEIYEK | H | 728,412874 | 2 | 1087,576116 | 1 | y9  |
| sp P00330 ADH1_YEAST  | VVGLSTLPEIYEK | H | 728,412874 | 2 | 899,496409  | 1 | y7  |
| sp P00330 ADH1_YEAST  | VVGLSTLPEIYEK | H | 728,412874 | 2 | 786,412345  | 1 | y6  |
